# Supplementary material
Source: publisher site journal article supplement (https://www.spandidos-publications.com/7450/downloadSupplementary)
Supplement: Supplementary file 1 [file downloadSupplementary]

## Sheet: Sheet1
Table SI. Antibodies and conditions for immunohistochemical experiments.
Markers	Company	Catalog number	Clone	Dilution	Antigen retrival	Incubation time, min	Incubation temperature, ˚C	Immunostainer (company)	Assessment
S100	Fuzhou Maixin Biotechnology Development Co., Ltd.	4C4.9	4C4.9	Pre-diluted	EDTA PH8	30	32	Lumatas (Fuzhou Maixin Biotechnology Development Co., Ltd.)	C
SOX10	Fuzhou Maixin Biotechnology Development Co., Ltd.	EP268	EP268	Pre-diluted	EDTA PH8	30	32	Lumatas (Fuzhou Maixin Biotechnology Development Co., Ltd.)	N
Melan-A	Fuzhou Maixin Biotechnology Development Co., Ltd.	A103	A103	Pre-diluted	EDTA PH8	30	32	Lumatas (Fuzhou Maixin Biotechnology Development Co., Ltd.)	C
HMB45	Fuzhou Maixin Biotechnology Development Co., Ltd.	HMB45	HMB45	Pre-diluted	EDTA PH8	30	32	Lumatas (Fuzhou Maixin Biotechnology Development Co., Ltd.)	C
AE1/AE3	Fuzhou Maixin Biotechnology Development Co., Ltd.	AE1/AE3	AE1/AE3	Pre-diluted	EDTA PH8	30	32	Lumatas (Fuzhou Maixin Biotechnology Development Co., Ltd.)	C
SMA	Fuzhou Maixin Biotechnology Development Co., Ltd.	MX097	MX097	Pre-diluted	EDTA PH8	30	32	Lumatas (Fuzhou Maixin Biotechnology Development Co., Ltd.)	C
Desminn	Fuzhou Maixin Biotechnology Development Co., Ltd.	MX046	MX046	Pre-diluted	EDTA PH8	30	32	Lumatas (Fuzhou Maixin Biotechnology Development Co., Ltd.)	C
CD34	Fuzhou Maixin Biotechnology Development Co., Ltd.	MX123	MX123	Pre-diluted	EDTA PH8	30	32	Lumatas (Fuzhou Maixin Biotechnology Development Co., Ltd.)	C
TTF1	Fuzhou Maixin Biotechnology Development Co., Ltd.	MX011	MX011	Pre-diluted	EDTA PH8	30	32	Lumatas (Fuzhou Maixin Biotechnology Development Co., Ltd.)	N
Napsin-A	Fuzhou Maixin Biotechnology Development Co., Ltd.	MX015	MX015	Pre-diluted	EDTA PH8	30	32	Lumatas (Fuzhou Maixin Biotechnology Development Co., Ltd.)	C
EMA	Fuzhou Maixin Biotechnology Development Co., Ltd.	E29	E29	Pre-diluted	EDTA PH8	30	32	Lumatas (Fuzhou Maixin Biotechnology Development Co., Ltd.)	C
Ki-67	Fuzhou Maixin Biotechnology Development Co., Ltd.	SP6	SP6	Pre-diluted	EDTA PH8	30	32	Lumatas (Fuzhou Maixin Biotechnology Development Co., Ltd.)	N
TFE3	Fuzhou Maixin Biotechnology Development Co., Ltd.	MRQ-37	MRQ-37	Pre-diluted	EDTA PH8	30	32	Lumatas (Fuzhou Maixin Biotechnology Development Co., Ltd.)	N
NTRK	Fuzhou Maixin Biotechnology Development Co., Ltd.	MXR032	MXR032	Pre-diluted	EDTA PH8	32	37	Lumatas (Fuzhou Maixin Biotechnology Development Co., Ltd.)	C
MITF	Fuzhou Maixin Biotechnology Development Co., Ltd.	D5F3	SP71	Pre-diluted	EDTA PH8	30	32	Lumatas (Fuzhou Maixin Biotechnology Development Co., Ltd.)	N
ALK	Roche Diagnostics GmbH	VE1	D5F3	Pre-diluted	EDTA PH8	32	37	Benchmark ULTRA immunostainer (Roche Diagnostics GmbH)	C
BRAF	Roche Diagnostics GmbH	SP263	VE1	Pre-diluted	EDTA PH8	32	37	Benchmark ULTRA immunostainer (Roche Diagnostics GmbH)	C
PDL1	Roche Diagnostics GmbH		SP263	Pre-diluted	EDTA PH8	32	37	Benchmark ULTRA immunostainer (Roche Diagnostics GmbH)	M
SOX10, sry-box transcription factor 10; HMB45, human melanoma black-45; SMA, smooth muscle actin: TTF1, thyroid transcription factor-1; EMA, epithelial membrane antigen; NTRK, neurotrophic tyrosine receptor kinase; ALK, anaplastic lymphoma kinase; PDL1, programmed death-ligand 1; N, nuclear; C, cytoplasmic; M, membraneous.
